# Supplementary material for: Molybdenum complexes derived from the oxydianiline [(2-NH2C6H4)2O]: synthesis, characterization and ε-caprolactone ROP capability
Source: Royal Society of Chemistry journal article supplement (doi:10.1039/c5dt01799h), 2015-01-01
Supplement: c5dt01799h1.pdf [file c5dt01799h1.pdf]

Electronic supplementary information

## **Molybdenum complexes derived from the oxydianiline [(2-NH<sub>2</sub>C<sub>6</sub>H<sub>4</sub>)<sub>2</sub>O]: Synthesis, characterization and $\epsilon$ -caprolactone ROP capability.**

Wenxue Yang,<sup>a</sup> Qe-King Zhao,<sup>a</sup> Carl Redshaw,<sup>a,b\*</sup> and Mark R.J. Elsegood<sup>c</sup>

### **Contents**

**Figure S1** X-band EPR of **2**.

**Figure S2** <sup>1</sup>H NMR spectrum of **3** (low field region).

**Figure S3** Plot of monomer conversion *versus* number average molecular weight for **2**.

**Figure S4** Plot of monomer conversion *versus* number average molecular weight for **3**.

**Figure S5** MALDI-TOF spectrum of PCL from run 10 (Table 1).

**Figure S6** MALDI-TOF spectrum of PCL from run 18 (Table 1).

**Figure S7** <sup>1</sup>H NMR spectrum of the PCL from run 10 (Table 1).

**Figure S8** <sup>1</sup>H NMR spectrum of the PCL from run 18 (Table 1).

**Figure S9** <sup>13</sup>C NMR spectrum of the PCL from run 10 (Table 1).

**Figure S10** <sup>13</sup>C NMR spectrum of the PCL from run 18 (Table 1).

**Figure S11** MALDI-TOF spectrum of PCL from run 21 (Table 1).

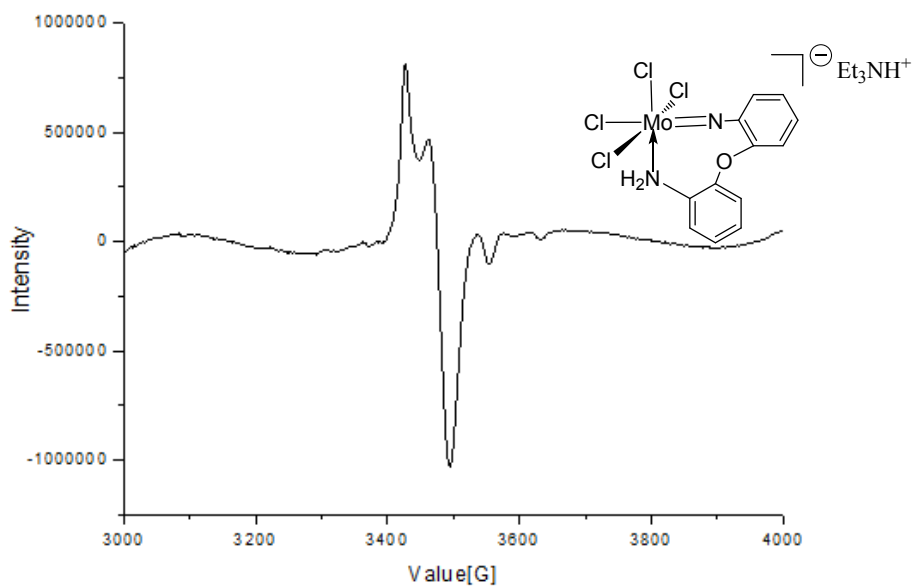

**Figure S1.** X-band EPR spectrum of **2** (solid at 110 K).

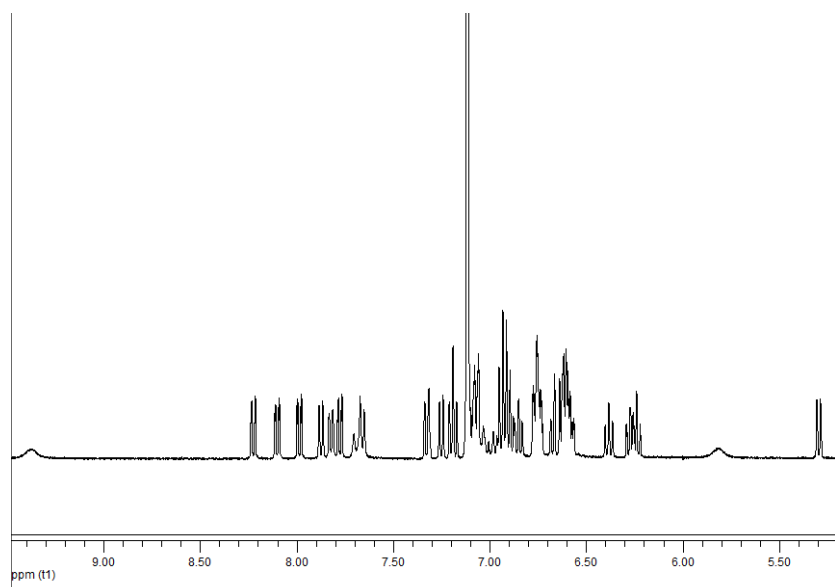

**Figure S2**  $^1\text{H}$  NMR spectrum of **3** (low field region).

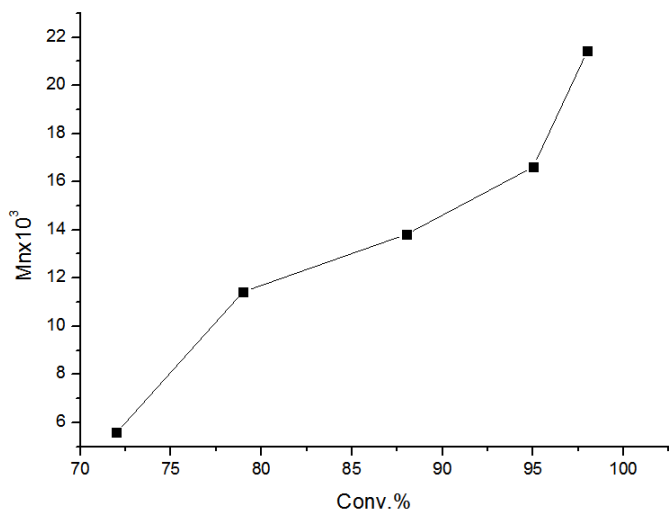

**Figure S3** Plot of monomer conversion *versus* number average molecular weight for **1** (entries 2, 4–7, Table 1).

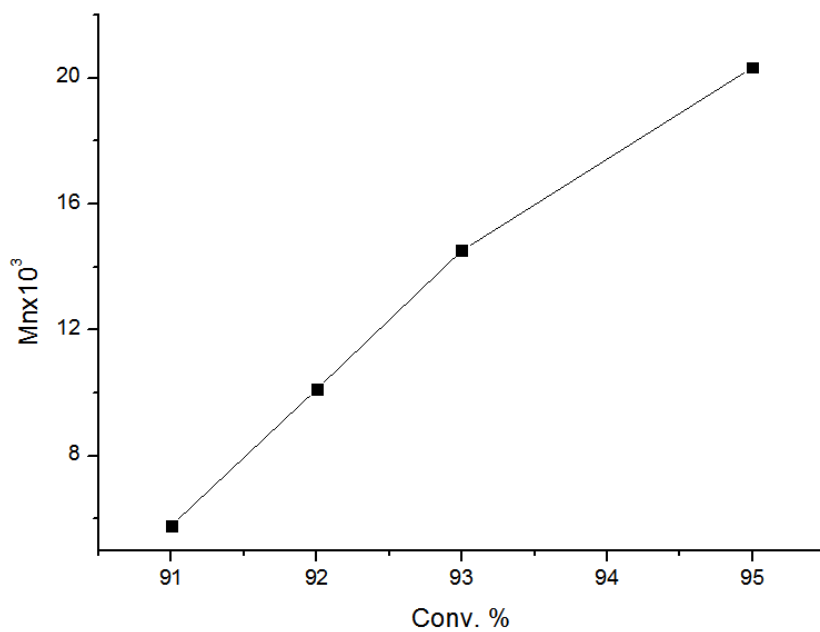

**Figure S4** Plot of monomer conversion *versus* number average molecular weight for **3** (entries 13, 15–17, Table 1).

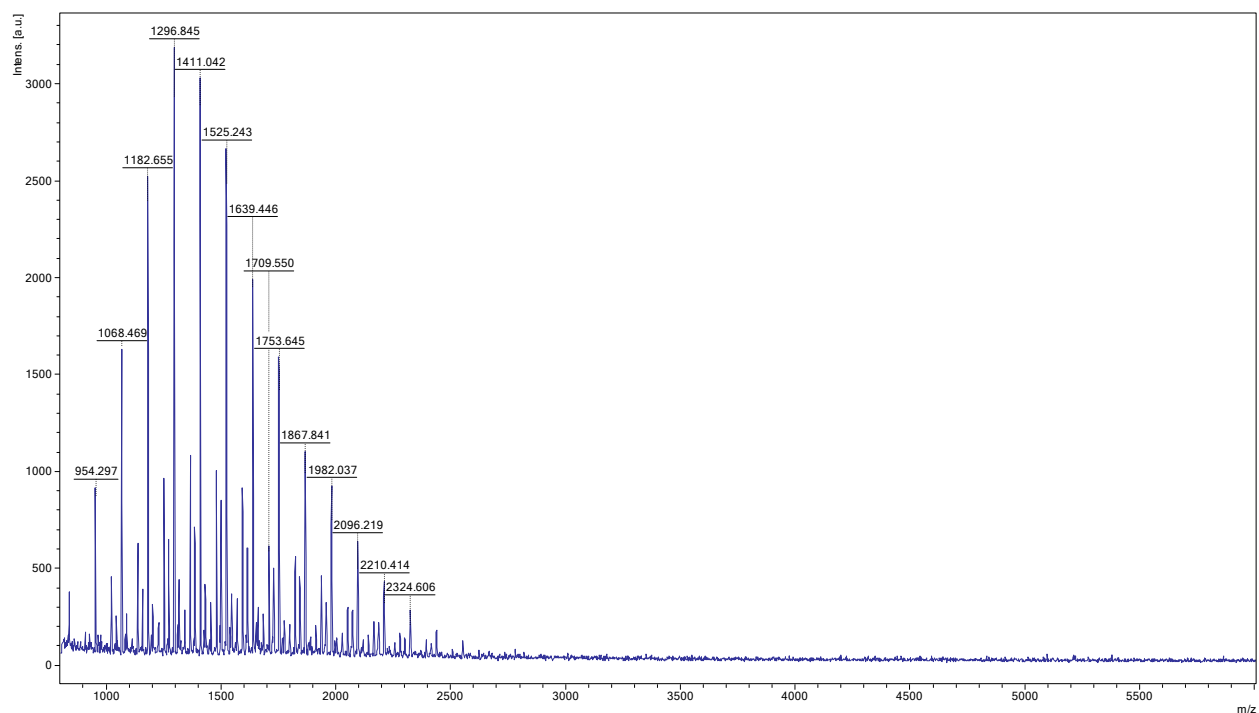

**Figure S5.** MALDI-TOF spectrum of the PCL from run 10, table 1 (complex 2).

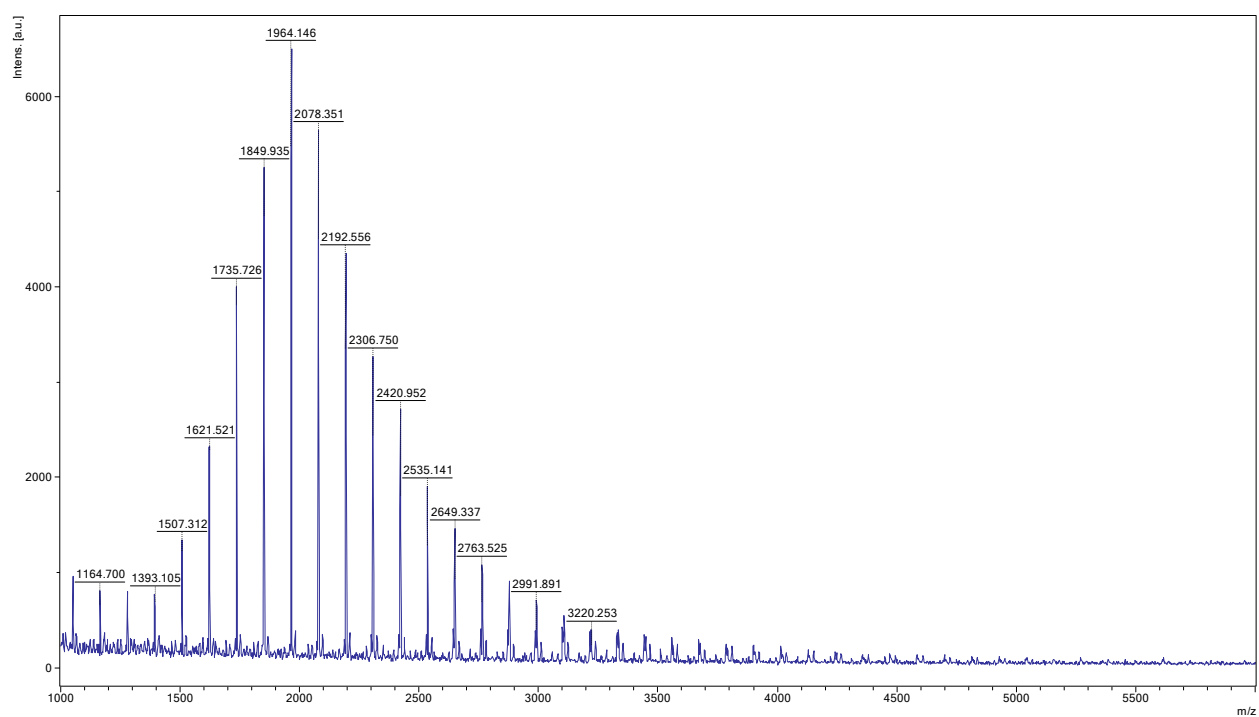

**Figure S6.** MALDI-TOF spectrum of the PCL from run 18, table 1 (complex 3).

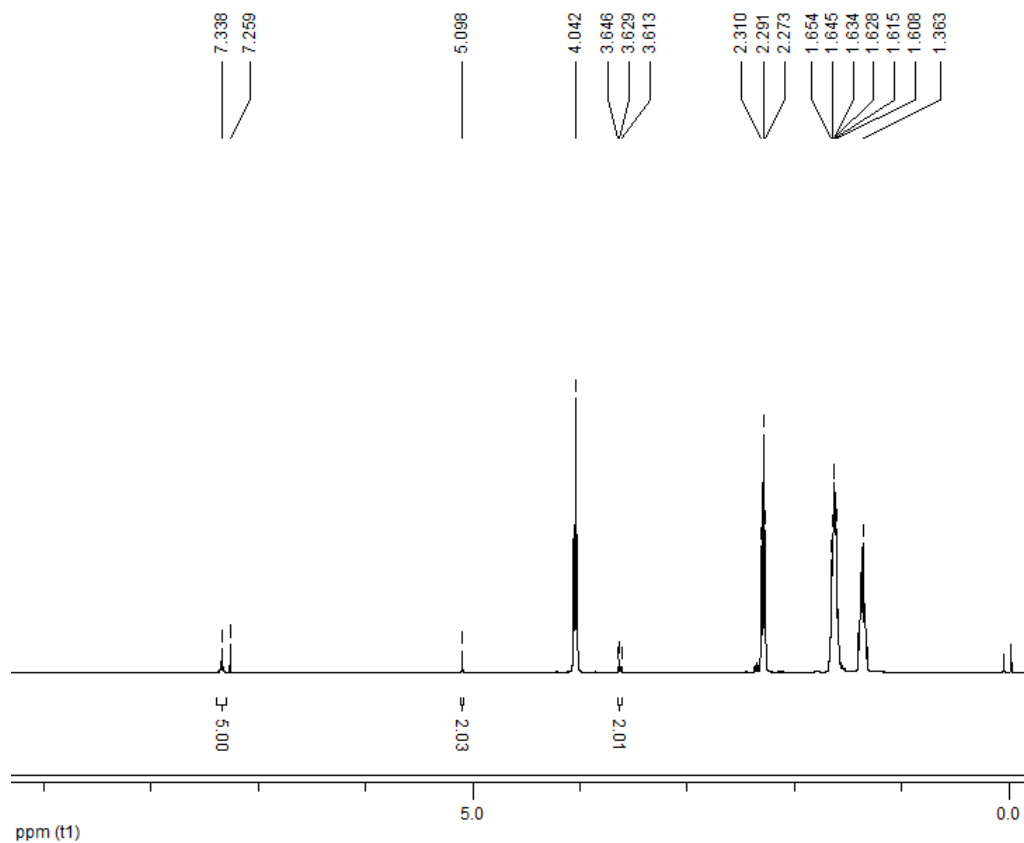

**Figure S7**  $^1\text{H}$  NMR spectrum ( $\text{CDCl}_3$ , 400 MHz) of the PCL from run 10 (Table 1).

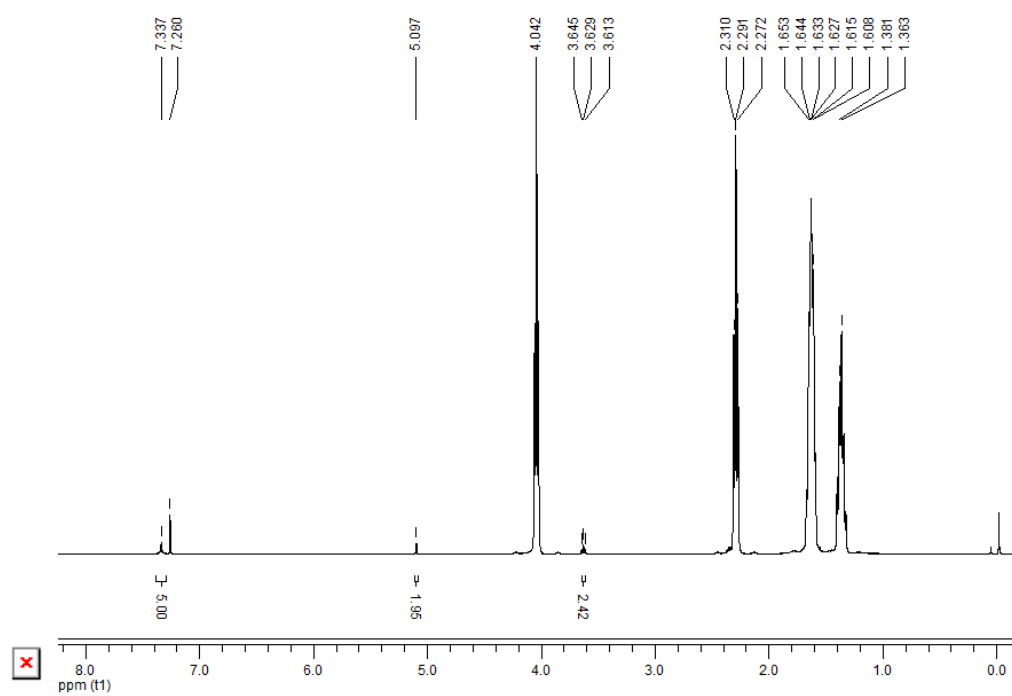

**Figure S8**  $^1\text{H}$  NMR spectrum ( $\text{CDCl}_3$ , 400 MHz) of the PCL from run 18 (Table 1).

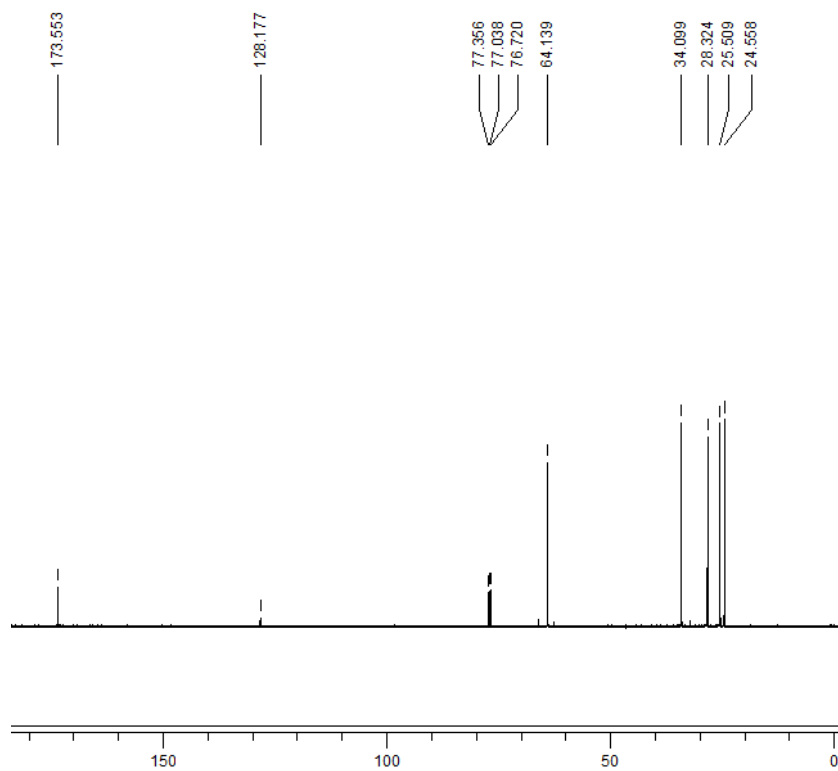

**Figure S9** <sup>13</sup>C NMR spectrum (CDCl<sub>3</sub>, 400 MHz) of the PCL from run 10 (Table 1).

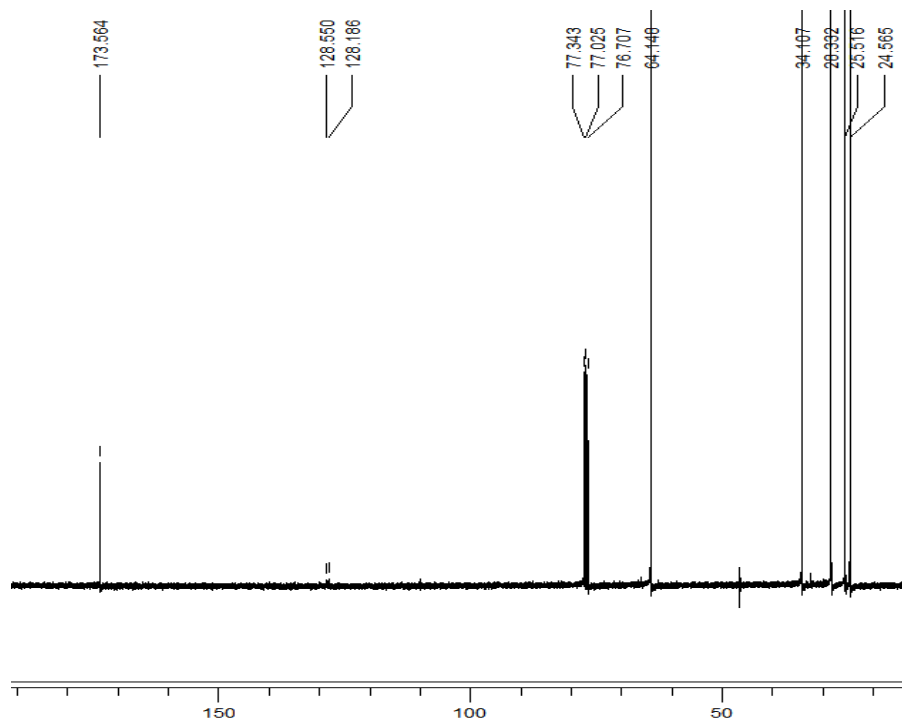

**Figure S10** <sup>13</sup>C NMR spectrum (CDCl<sub>3</sub>, 400 MHz) of the PCL from run 18 (Table 1).

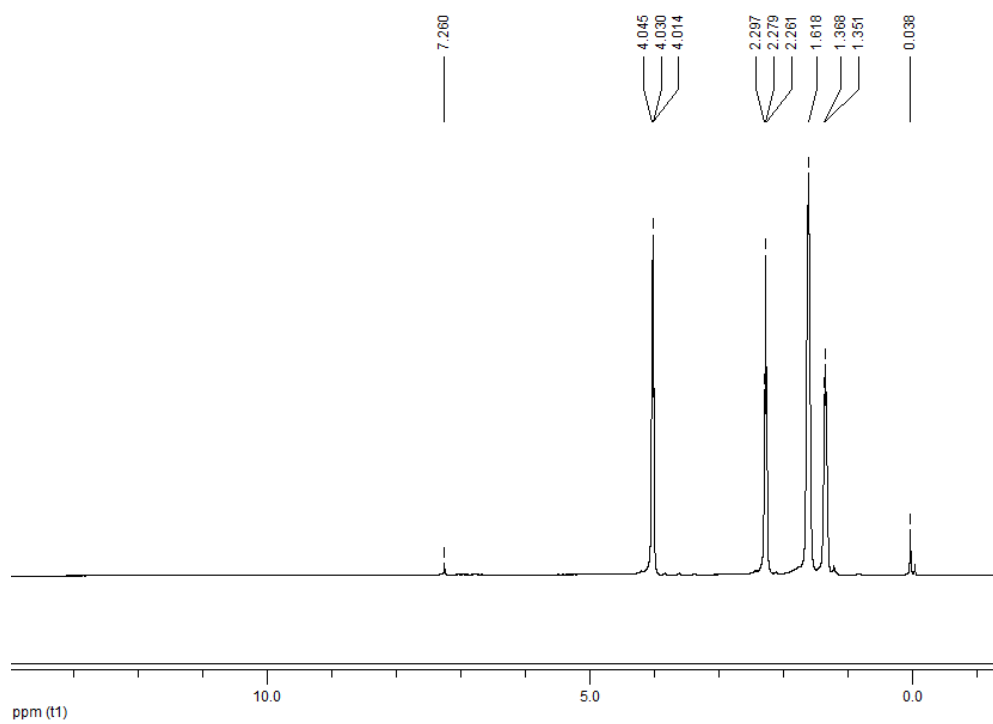

<sup>1</sup>H NMR spectrum (CDCl<sub>3</sub>, 400 MHz) of the PCL from run 21 (Table 1)

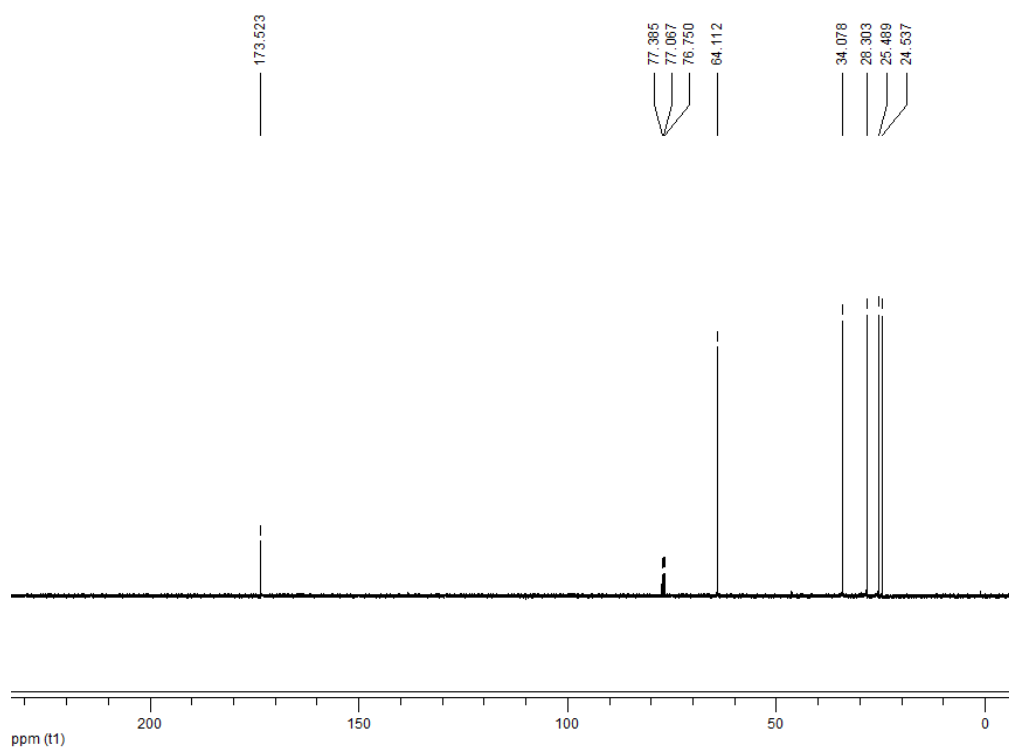

<sup>13</sup>C NMR spectrum (CDCl<sub>3</sub>, 400 MHz) of the PCL from run 21 (Table 1)

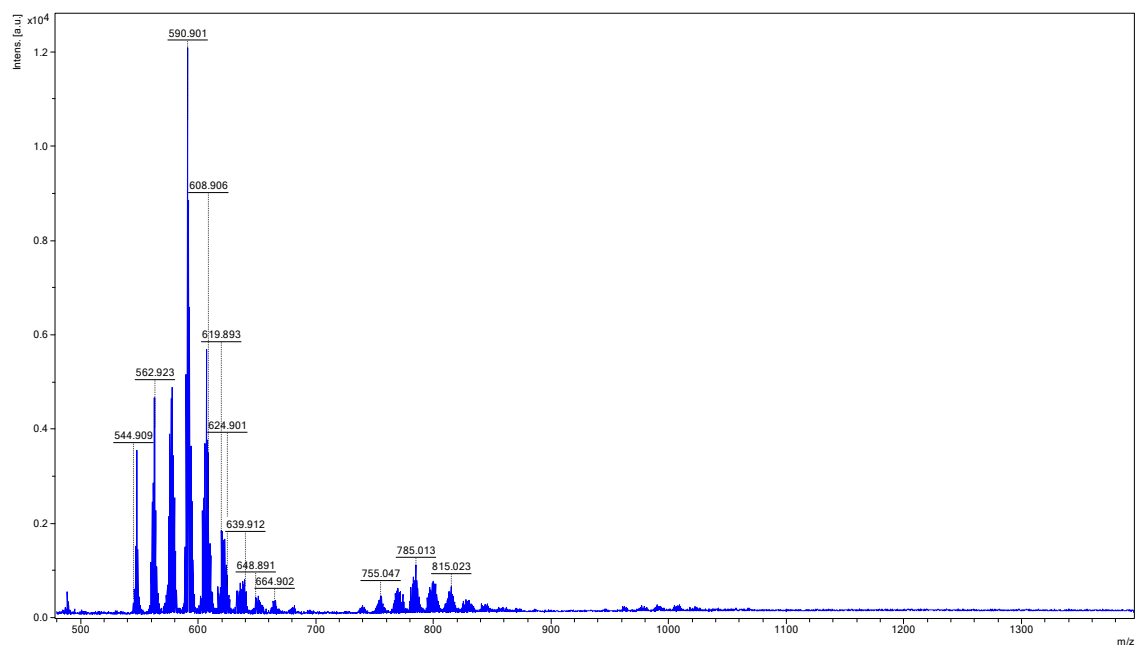

**Figure S11** MALDI-TOF spectrum of PCL from run 21 (Table 1).
